# Supplementary material for: Development of a New HiBiT Biosensor Monitoring Stability of YAP/TAZ Proteins in Cells
Source: MDPI journal article supplement (doi:10.3390/chemosensors11090492), 2023-09-06
Supplement: s1 [file s1]

Wu et al., Chemosensors 2023

Supplementary figure and table

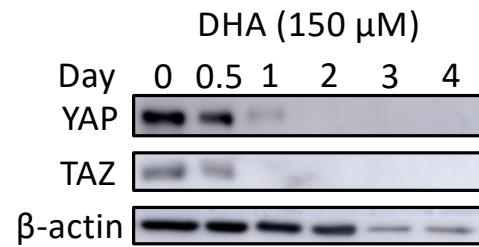

**Figure S1.** Degradation of endogenous YAP/TAZ after DHA treatment. The WT MDA-MB-231 cells were treated with 150  $\mu$ M of DHA for a total of 4 days. The protein lysates were obtained after 0, 0.5, 1, 2, 3, and 4 days. The WB was performed with 10  $\mu$ g of each lysate for detecting YAP and TAZ expression levels. The  $\beta$ -actin was included as an internal loading control.

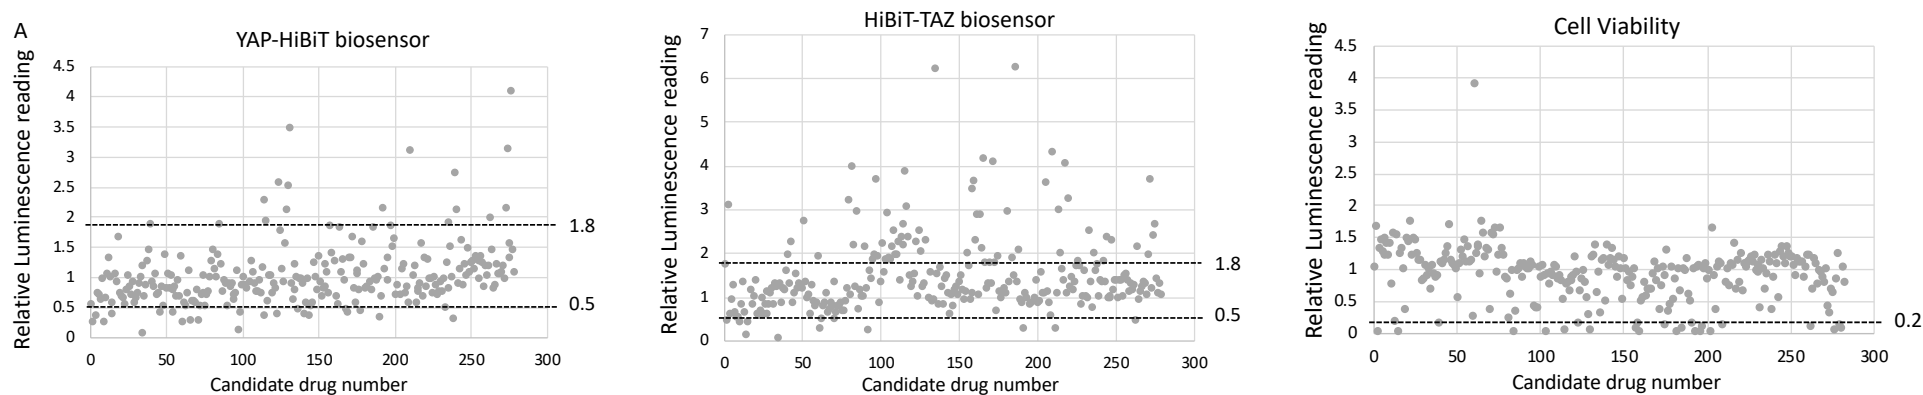

**Figure S2.** Small-scale screening of YAP/TAZ SMIs with a bioactive lipid library and custom compound library. Two libraries composed of 279 candidates were used in this screening. MDA-MB231 cells that were transfected with HiBiT-tagged YAP/TAZ plasmids were seeded in 96-well plates after 5 hours post-transfection. The next day, the cells were treated with the candidate SMs at a concentration of 100  $\mu$ M for 48 hours. After that, the luminescence from YAP-HiBiT (**a**) and HiBiT-TAZ (**b**) was measured, recorded and compared to the control groups. The relative luminescence was calculated by measuring how much the bioluminescence changed in drug-treated cells, compared to 1% DMSO-treated cells. The dotted lines denote the 50% luminescent suppression or 180% increase in bioluminescence, respectively, and those drugs below or above the lines were considered primary positive hits. (**c**) A similar luciferase assay measuring cell viability was performed in parallel during the drug screen. To calculate the relative fold change, the bioluminescence signal from drug-treated cells was compared with the DMSO-treated sample. Any drugs that were toxic to the cells (fold change < 0.2) were excluded from the list. Each dot in the figures represents a single measurement.

**Table S1.** List of primers for cloning.

| Primer Name           | Sequence (5' to 3')                                                                              |
|-----------------------|--------------------------------------------------------------------------------------------------|
| Bg2-YAP-1F            | GAAGATCTACCATGGATCCCGGGCAGCAGCCG                                                                 |
| B1-TAZ-1F             | CGGGATCCACCATGAATCCGGCCTCGGCG                                                                    |
| B1-LgBiT-1F           | GCAGGATCCATGGTCTTCACACTCGAAGATTCGTTGGG                                                           |
| N1-HiBiT-YAP-1R       | ATAGTTTAGCGGCCGCATTCTTATCTAGCTAATCTTCTTGAA<br>CAGCCGCCAGCCGCTCACTAACCATGTAAGAAAGCT               |
| N1-HiBiT-TAZ-1R       | ATAGTTTAGCGGCCGCATTCTTATTTAGCTAATCTTCTTGAA<br>CAGCCGCCAGCCGCTCACCCACCGGTGGCAGCCAGGTTA<br>GAAAGGG |
| N1-LgBiT-R            | ATGAAACTGCGGCCGCTTAACTGTTGATGGTTACTCGGAA<br>CAG                                                  |
| N1-Stop-HiBiT-LgBiT-R | ATGAAACTGCGGCCGCTTAGCTAATCTTCTTGAACAGCCG<br>CCAGCCGCTCACGCTGTTGATGGTTACTCGGAACAG                 |

**Table S2.** List of bioactive lipid library for small-scale screen.

| ID.   | Compound name             | ID.   | Compound name            | ID.    | Compound name                          |
|-------|---------------------------|-------|--------------------------|--------|----------------------------------------|
| T2282 | RPI1                      | T0002 | Ethamsylate              | T0516  | Sodium dehydrocholate                  |
| T2233 | GW 4064                   | T0045 | Heptaminol hydrochloride | T0570  | 3,5-Dihydroxybenzoic acid              |
| T0125 | Epirubicin hydrochloride  | T0070 | Pentoxifylline           | T2741  | Glycyrrhizin                           |
| T1783 | LXR623                    | T0022 | Taurine                  | T0584  | Maltose                                |
| T0685 | Retinyl acetate           | T0051 | Urethane                 | T1083L | Theophylline monohydrate               |
| T0307 | Tyloxapol                 | T0067 | Nicotinic acid N-oxide   | T0096  | Vardenafil                             |
| T0300 | Pargyline                 | T0160 | Anagrelide               | T0584L | D-(+)-Maltose monohydrate              |
| T0857 | Fenipentol                | T0155 | Argatroban               | T2900  | Paeonol                                |
| T1112 | 2-(Hydroxymethyl)pyridine | T0175 | Amiloride hydrochloride  | T0966  | Sennoside A                            |
| T1288 | TTNPB                     | T0188 | Fluticasone propionate   | T0973  | Pyridoxine                             |
| T0408 | Dehydrocholic acid        | T0235 | Modaline sulfate         | T0994  | Ketotifen fumarate                     |
| T0369 | Ethaverine hydrochloride  | T0254 | Probucol                 | T0988  | Trimetazidine dihydrochloride          |
| T0448 | Dexibuprofen              | T0257 | Mepiroxol                | T1002  | Etodolac                               |
| T0438 | Proflavine Hemisulfate    | T0264 | Zomepirac Sodium         | T1025  | Tranlycypromine (2-PCPA) hydrochloride |
| T0458 | Indometacin               | T0343 | Nimodipine               | T1046  | Mexiletine hydrochloride               |
| T0449 | Menadione                 | T0467 | Sildenafil citrate       | T1051  | Tretinoin                              |
| T0389 | Dabigatran etexilate      | T0469 | Octopamine hydrochloride | T1056  | Isoprenaline hydrochloride             |
| T0383 | Fenspiride hydrochloride  | T0477 | Zileuton                 | T1083  | Theophylline                           |
| T0462 | Cilostazol                | T0480 | Doxofylline              | T1086  | Vitamin D2                             |
| T0017 | Phenolphthalein           | T0504 | Cyclandelate             | T1093  | Adapalene                              |

Table S2 continued

| ID.   | Compound name                | ID.   | Compound name                | ID.   | Compound name                      |
|-------|------------------------------|-------|------------------------------|-------|------------------------------------|
| T1096 | Milrinone                    | T0705 | Triflusal                    | T0846 | L(-)-Carnitine                     |
| T1117 | Clorgyline hydrochloride     | T0687 | Simvastatin                  | T0847 | Chenodeoxycholic acid              |
| T1119 | Rasagiline                   | T0690 | Quinine                      | T2563 | O-Acetyl-L-carnitine hydrochloride |
| T1149 | Fenofibrate                  | T0693 | Niflumic acid                | T0942 | Quinacrine dihydrochloride         |
| T2201 | 6-Mercaptopurine monohydrate | T0679 | Ketoconazole                 | T0944 | Levamisole hydrochloride           |
| T2202 | Lithocholic acid             | T0683 | Mevastatin                   | T0949 | Amstat                             |
| T2205 | Theophylline-7-acetic acid   | T0686 | Orlistat                     | T1394 | Ibuprofen                          |
| T1184 | Rivaroxaban                  | T0672 | Pravastatin sodium           | T1398 | Tadalafil                          |
| T1296 | Aminopar                     | T0775 | Coumarin                     | T1401 | Meclofenoxate hydrochloride        |
| T1264 | Ciprofibrate                 | T0751 | Furazolidone                 | T1402 | Fenofibric acid                    |
| T2907 | Tanshinone I                 | T0745 | Disodium monofluorophosphate | T1415 | Gemfibrozil                        |
| T2938 | Polydatin                    | T0879 | Nicotinic acid               | T1420 | Diethylcarbamazine citrate         |
| T2857 | Gentisic acid                | T0881 | 6-Aminocaproic acid          | T1426 | Pyrazinamide                       |
| T2963 | Cholic Acid                  | T0892 | Diprophylline                | T1519 | Rimonabant hydrochloride           |
| T0167 | Vinpocetine                  | T2968 | Hyodeoxycholic acid          | T1537 | Rapamycin                          |
| T0642 | 2-Methoxyphenothiazine       | T2729 | Scoparone                    | T1555 | Diclofenac sodium                  |
| T0646 | Mesalamine                   | T2869 | Emodin                       | T1558 | Resveratrol                        |
| T0664 | Nicotinic acid hydrazide     | T2888 | Pterostilbene                | T1676 | Rosuvastatin                       |
| T2565 | Hesperetin                   | T0919 | Benfluorex hydrochloride     | T1330 | Acitretin                          |
| T1027 | Luteolin                     | T0821 | Iproniazid Phosphate         | T2448 | CH 223191                          |

Table S2 continued

| ID.    | Compound name                 | ID.   | Compound name           | ID.   | Compound name           |
|--------|-------------------------------|-------|-------------------------|-------|-------------------------|
| T1611  | Isotretinoin                  | T2334 | Avanafil                | T1846 | Y320                    |
| T1626  | Alprostadil                   | T2338 | JZL195                  | T1915 | AM251                   |
| T1618  | Dipyridamole                  | T2984 | Scopoletin              | T1789 | Obeticholic Acid        |
| T1633  | Beta-Carotene                 | T2855 | Icariin                 | T1487 | Fluvastatin sodium salt |
| T1681  | Aminophylline                 | T2966 | Beta-Sitosterol         | T1510 | Rosuvastatin calcium    |
| T2368  | Edoxaban Tosylate Monohydrate | T3121 | Betulin                 | T2923 | Apremilast              |
| T1801  | SR9243                        | T3116 | Atorvastatin Calcium    | T2030 | Tiplaxtinin             |
| T2368L | Edoxaban                      | T6450 | Clinofibrate            | T2015 | Fexaramine              |
| T2264  | AM281                         | T6644 | Rolipram                | T2000 | AM095                   |
| T1928  | Anacetrapib                   | T3044 | Teriflunomide           | T1745 | TAK063                  |
| T1964  | UM729                         | T1713 | IBMX                    | T1747 | Torezolid               |
| T2538  | Bimatoprost                   | T0084 | Moclobemide             | T2438 | HMN214                  |
| T2554  | Etofibrate                    | T2137 | Ibudilast               | T2700 | FTI 277 hydrochloride   |
| T2534  | Pitavastatin calcium          | T1265 | Amrinone                | T2468 | A 769662                |
| T1708  | Pimobendan                    | T0077 | Dantrolene sodium salt  | T2753 | Avasimibe               |
| T2499  | Torcetrapib                   | T0080 | Trapidil                | T2701 | GSK1292263              |
| T2271  | SBE 13 hydrochloride          | T1024 | Roflumilast             | T1736 | Apixaban                |
| T2249  | XEN445                        | T1711 | Harmine                 | T1872 | Fenretinide             |
| T1738  | Taxifolin                     | T1796 | Otenabant hydrochloride | T2635 | Org 27569               |
| T2646  | HA130                         | T1831 | StemRegenin 1           | T2044 | Varespladib             |

Table S2 continued

| ID.    | Compound name          | ID.   | Compound name                       |
|--------|------------------------|-------|-------------------------------------|
| T1519L | Rimonabant             | T3591 | URB602                              |
| T1960  | YL109                  | T6529 | Halobetasol Propionate              |
| T1771  | Ro 48-8071 fumarate    | T6267 | Lomitapide                          |
| T1866  | AT56                   | T4097 | Vardenafil hydrochloride trihydrate |
| T1875  | Atglistatin            | T4192 | hnps-PLA Inhibitor                  |
| T6042  | PF-2545920             | T4041 | GLPG1690                            |
| T3616  | Carbazochrome          | T3987 | Lotamilast                          |
| T3606  | Gamma-Oryzanol         | T6554 | JZL184                              |
| T3417  | Amentoflavone          | T4052 | KML29                               |
| T3631  | PF8380                 | T3580 | FIPI                                |
| T3647  | HTHQ                   | T4179 | Probucol disuccinate                |
| T3666  | Atractylodin           | T4347 | ML355                               |
| T6151  | GW501516               | T5074 | Cholesteryl palmitate               |
| T6109  | Darapladib             |       |                                     |
| T3698  | alpha-Asarone          |       |                                     |
| T6053  | Turofexorate Isopropyl |       |                                     |
| T6485  | Embelin                |       |                                     |
| T6690  | T0901317               |       |                                     |
| T3941  | Choline Fenofibrate    |       |                                     |
| T6048  | Dalcetrapib            |       |                                     |



**Table S3.** List of custom compound library for small-scale screen.

| ID.    | Compound name                        | ID.     | Compound name                      | ID.   | Compound name               |
|--------|--------------------------------------|---------|------------------------------------|-------|-----------------------------|
| T0478  | Progesterone                         | T1429   | Hydroxyprogesterone                | T4776 | Glycerol                    |
| T0948L | Corticosterone                       | T1688   | 5Beta-Pregnane-3Alpha,20alpha-Diol | T4766 | 3-Methylglutaric acid       |
| T0856L | Dehydroepiandrosterone               | T1571   | Estriol                            | T4943 | 1-Oleoyl-rac-glycerol       |
| T2908  | Palmitic acid                        | T1614   | Hydrocortisone                     | T4740 | Elaidic acid                |
| T0301  | Ethisterone                          | T2532   | Tauroursodeoxycholic Acid          | T4867 | Erucic acid                 |
| T1009  | Aquacrine                            | T2967   | Stigmasterol                       | T4717 | 25-Hydroxycholesterol       |
| T1048  | Estradiol                            | T2220   | 2-Methoxyestradiol                 | T4855 | Tricosanoic acid            |
| T1138  | Taurocholic acid sodium salt hydrate | T3220   | Euphorbiasteroid                   | T4950 | 1,2-Dipalmitoyl-sn-glycerol |
| T2195  | Epiandrosterone                      | T3237   | Lecithin                           | T4872 | Palmitoleic acid            |
| T2831  | Glycocholic acid                     | T3357   | 17 alpha-propionate                | T4923 | 7-Dehydrocholesterol        |
| T2965  | Deoxycholic acid                     | T3378   | 17 $\alpha$ -Estradiol             | T4868 | gamma-Linolenic acid        |
| T2748  | Cortodoxone                          | T2P2810 | Methyl Linoleate                   | T4775 | Arachidic acid              |
| T2884  | Cortisone                            | T2O2668 | Oleic acid                         | T4944 | Nervonic acid               |
| T0700  | Ursodeoxycholic acid                 | T3S0640 | Glycerol trioleate                 | T4852 | Glyceryl trimyristate       |
| T0760  | Cholesterol                          | T3P2904 | Linolenic acid                     | T4859 | rac-Glycerol 1-myristate    |
| T0744  | Zinc undecylenate                    | T3949   | Myristic acid                      | T4870 | Petroselinic acid           |
| T2207  | Adrenosterone                        | T2P2923 | Stearic acid                       | T4970 | LANOSTEROL                  |
| T0851  | Pregnenolone                         | T4439   | Choline glycerophosphate           | T5077 | Sodium Desoxycholate        |
| T1393  | Sodium butanoate                     | TWO2727 | Tripalmitin                        | T5014 | Prostaglandin E2 (PGE2)     |
| T1424  | Ethynyl estradiol                    | T4749   | Squalene                           | T7064 | Valproic Acid               |

Table S3 continued

| ID.   | Compound name            |
|-------|--------------------------|
| T5369 | Docosahexaenoic Acid     |
| T4129 | Arachidonic acid         |
| T5264 | Androsterone             |
| T5256 | All trans-Retinal        |
| T5212 | Glycerol trilinoleate    |
| T5266 | Glycerol Tri-n-octanoate |

**Table S4.** Quantitation of YAP and TAZ protein levels in TNBC cells treated with either of the initial hits by densitometric analysis.

| Compound | YAP (relative to controls) | TAZ (relative to controls) | Compound | YAP (relative to controls) | TAZ (relative to controls) |
|----------|----------------------------|----------------------------|----------|----------------------------|----------------------------|
| 1        | 0.82                       | 0.86                       | 21       | 1.09                       | 0.73                       |
| 2        | 0.72                       | 0.77                       | 22       | 0.58                       | 0.46                       |
| 3        | 0.83                       | 0.55                       | 23       | 2.72                       | 0.75                       |
| 4        | 0.64                       | 0.57                       | 24       | 2.32                       | 1.08                       |
| 5        | 0.84                       | 0.53                       | 25       | 3.81                       | 1.10                       |
| 6        | 0.56                       | 0.42                       | 26       | 4.44                       | 1.00                       |
| 7        | 0.60                       | 0.44                       | 27       | 5.62                       | 0.84                       |
| 8        | 0.66                       | 0.49                       | 28       | 1.64                       | 0.47                       |
| 9        | 0.09                       | 0.14                       | 29       | 0.85                       | 0.37                       |
| 10       | 0.03                       | 0.05                       | 30       | 2.76                       | 0.99                       |
| 11       | 0.31                       | 0.35                       | 31       | 4.62                       | 1.01                       |
| 12       | 1.39                       | 1.17                       | 32       | 3.56                       | 0.91                       |
| 13       | 1.69                       | 1.27                       | 33       | 0.91                       | 0.36                       |
| 14       | 1.04                       | 0.97                       | 34       | 0.87                       | 0.51                       |
| 15       | 0.95                       | 0.78                       | 35       | 0.36                       | 0.15                       |
| 16       | 0.91                       | 0.70                       | 36       | 0.24                       | 0.08                       |
| 17       | 1.05                       | 0.80                       | 37       | 1.55                       | 0.48                       |
| 18       | 0.91                       | 0.59                       | 38       | 0.59                       | 0.15                       |
| 19       | 0.74                       | 0.76                       | 39       | 0.30                       | 0.14                       |
| 20       | 0.44                       | 0.31                       | 40       | 0.52                       | 0.22                       |

Table S4 continued

| Compound | YAP (relative to controls) | TAZ (relative to controls) | Compound | YAP (relative to controls) | TAZ (relative to controls) |
|----------|----------------------------|----------------------------|----------|----------------------------|----------------------------|
| 41       | 0.87                       | 0.28                       | 61       | 0.73                       | 0.41                       |
| 42       | 0.52                       | 0.31                       | 62       | 0.30                       | 0.08                       |
| 43       | 0.35                       | 0.14                       | 63       | 1.39                       | 0.61                       |
| 44       | 0.18                       | 0.17                       | 64       | 0.38                       | 0.13                       |
| 45       | 0.28                       | 0.35                       | 65       | 1.04                       | 0.54                       |
| 46       | 0.19                       | 0.27                       | 66       | 0.57                       | 0.43                       |
| 47       | 0.23                       | 0.20                       | 67       | 0.58                       | 0.54                       |
| 48       | 0.15                       | 0.16                       |          |                            |                            |
| 49       | 0.21                       | 0.23                       |          |                            |                            |
| 50       | 0.21                       | 0.22                       |          |                            |                            |
| 51       | 0.25                       | 0.26                       |          |                            |                            |
| 52       | 0.13                       | 0.14                       |          |                            |                            |
| 53       | 0.31                       | 0.35                       |          |                            |                            |
| 54       | 0.97                       | 0.83                       |          |                            |                            |
| 55       | 0.25                       | 0.19                       |          |                            |                            |
| 56       | 0.26                       | 0.18                       |          |                            |                            |
| 57       | 0.91                       | 0.72                       |          |                            |                            |
| 58       | 0.70                       | 0.30                       |          |                            |                            |
| 59       | 0.79                       | 0.48                       |          |                            |                            |
| 60       | 0.30                       | 0.20                       |          |                            |                            |
